# Supplementary material
Source: PubMed Central journal article supplement (PMC3033053)

**Supplemental Figure 1. NUMB is expressed in Rathke's Pouch at e10.5 by immunostaining and *in-situ* hybridization.** Midsagittal sections (A,C) show sporadic Numb expression within Rathke's Pouch and along lumen border. Peripheral sections (B,D) shows a stronger outer border staining around Rathke's Pouch. Photographs taken at 400x.

**Supplemental Figure 2. *Notch2* and downstream target expression are not altered in Numb conditional knockout pituitaries.** Real Time PCR shows *Notch2* and downstream targets *HeyL*, *Hes1*, *Hey1*, *Hey2*, gene expression does not differ between control and cDKO whole pituitaries (n=4).

# Supplemental Figure 1

Midsagittal

Peripheral

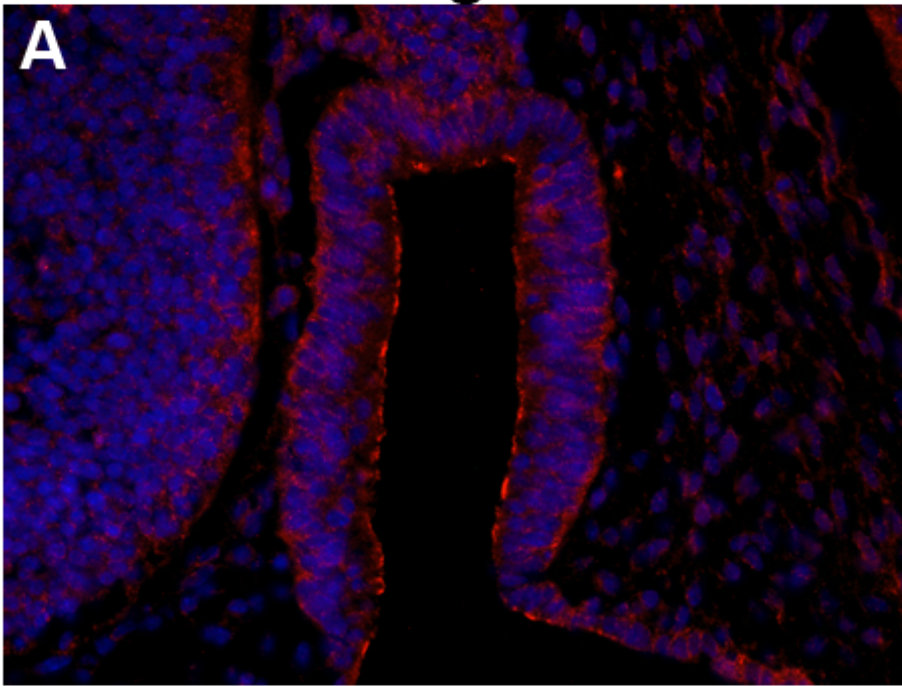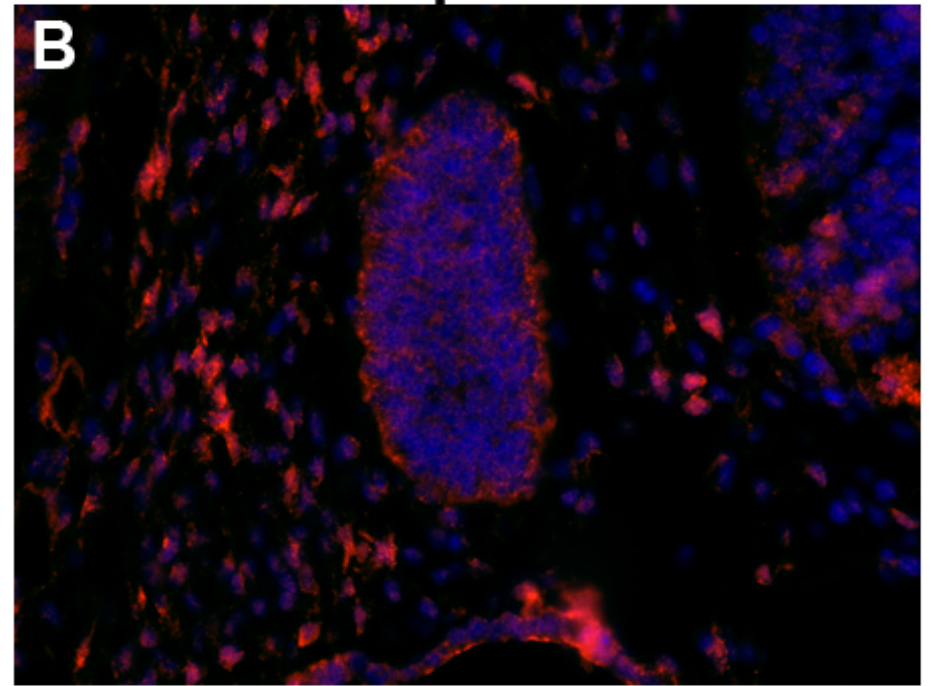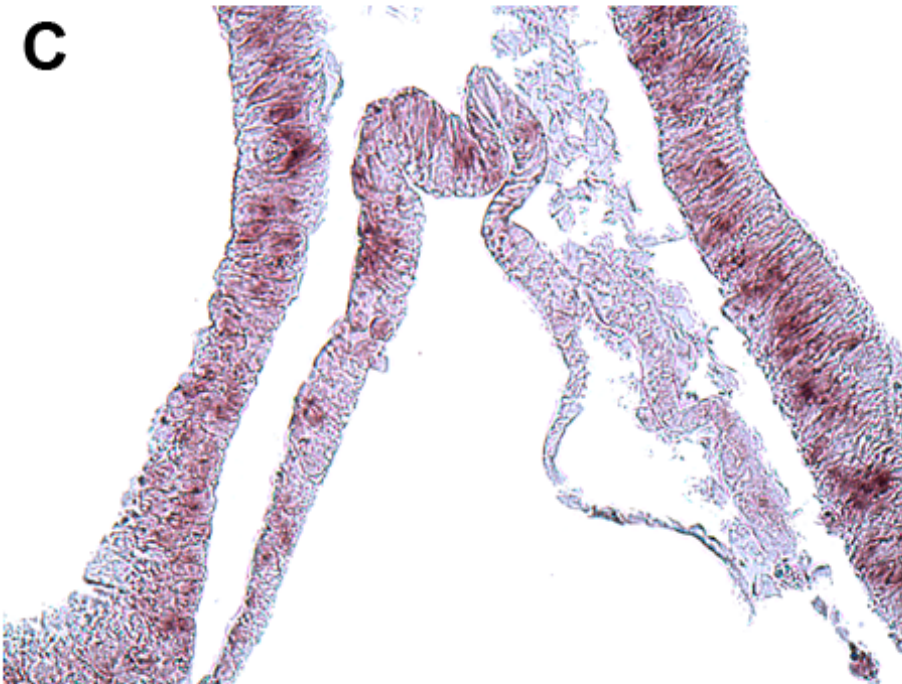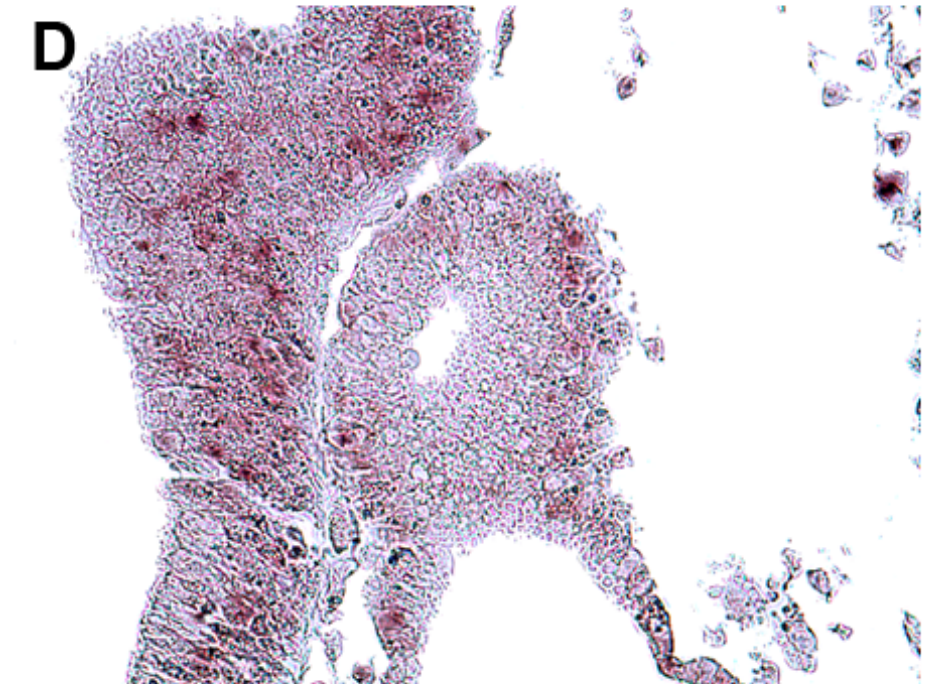

## Supplemental Figure 2

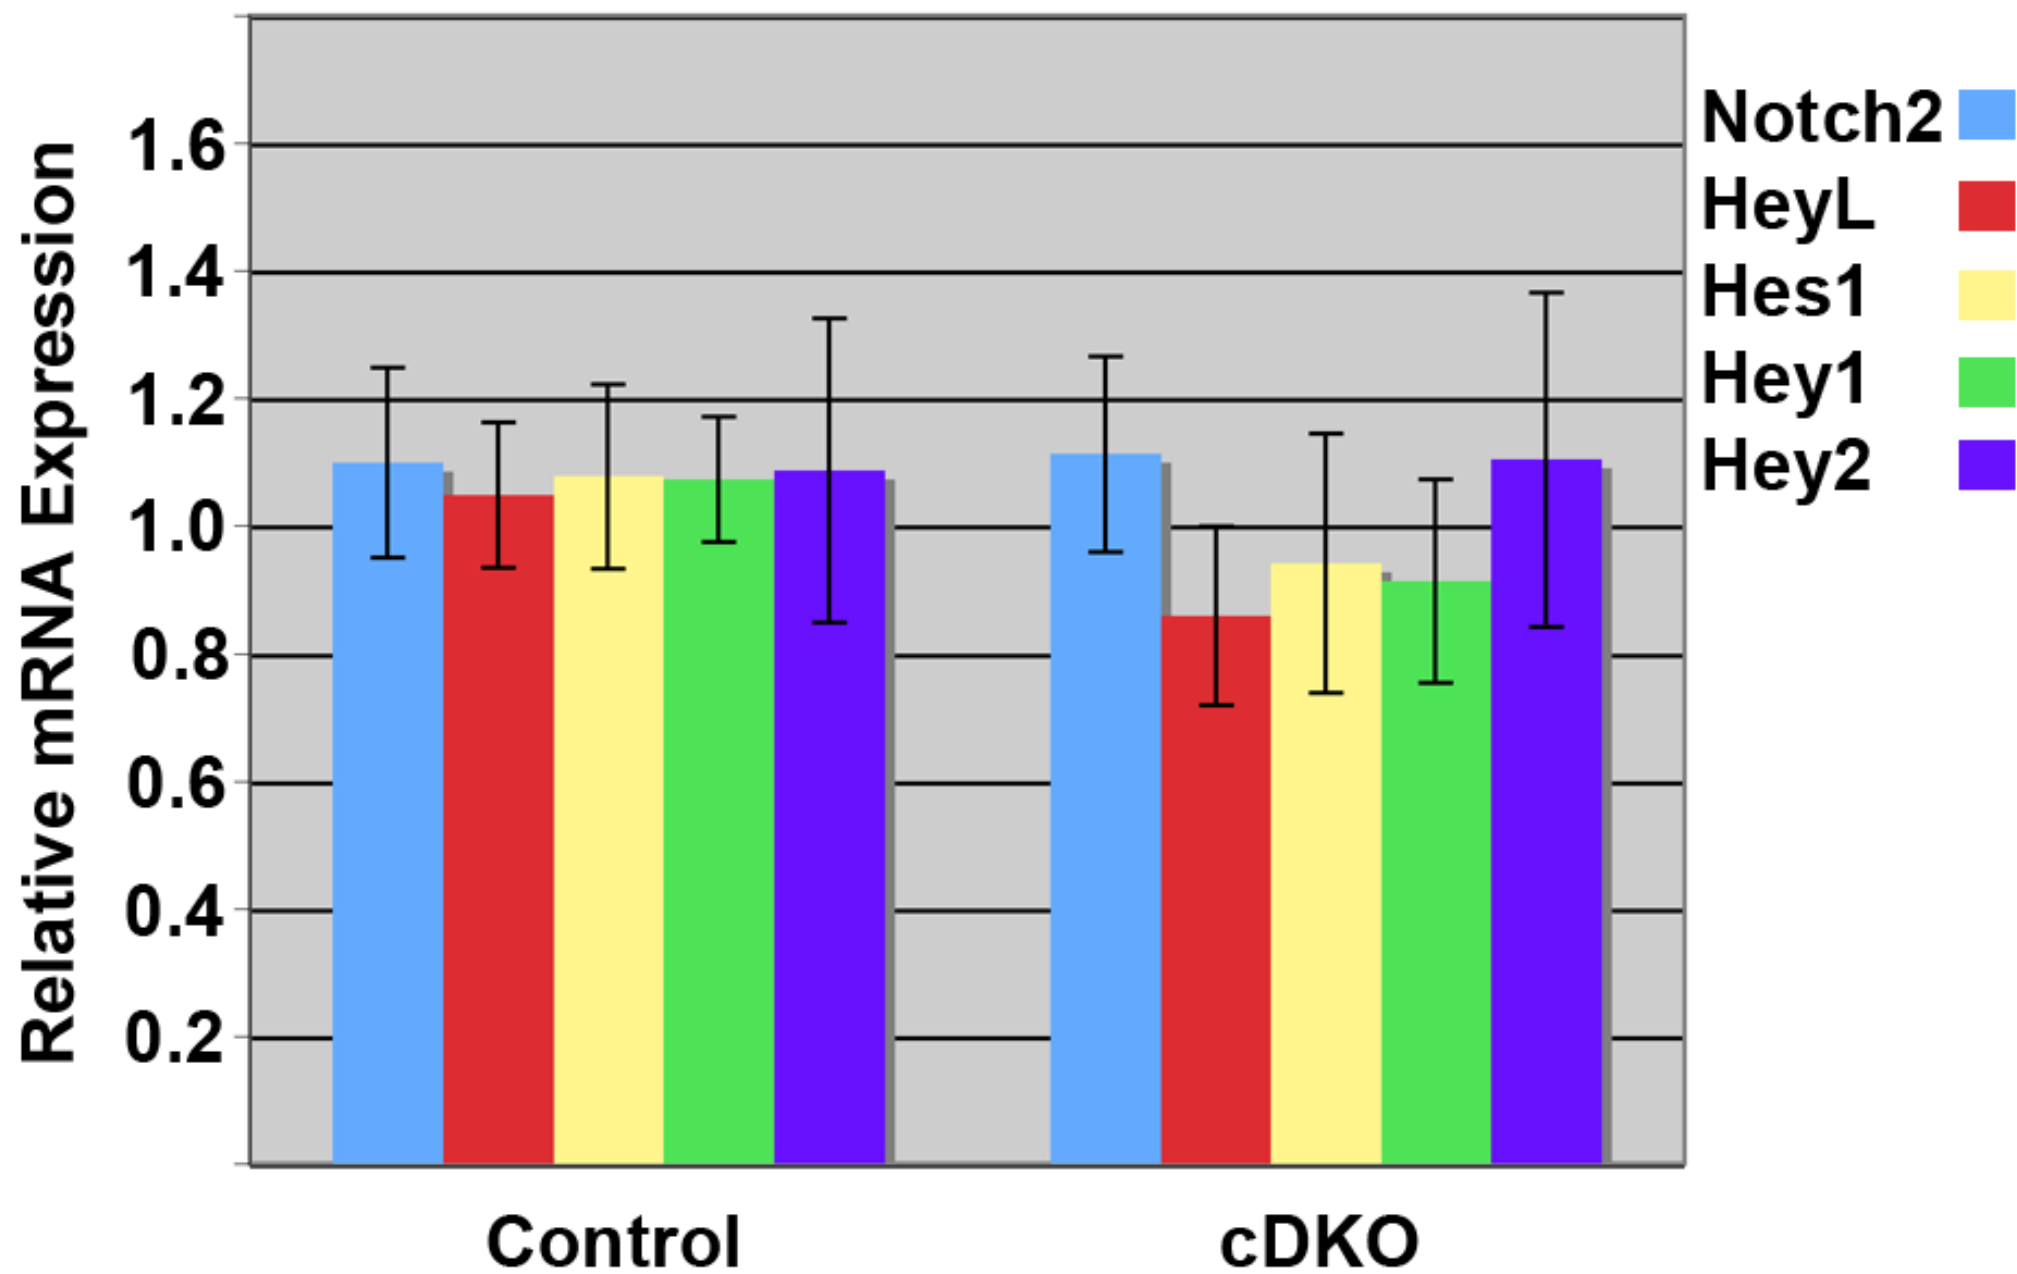

Supplement: me.2010-0248_1.pdf [file me.2010-0248_1.pdf]
